# Supplementary material for: The ER-SURF pathway uses ER-mitochondria contact sites for protein targeting to mitochondria
Source: PubMed Central journal article supplement (PMC11014988; doi:10.1038/s44319-024-00113-w), 2024-04-02
Supplement: 44319_2024_113_MOESM1_ESM.pdf [file 44319_2024_113_MOESM1_ESM.pdf]

## Table of Content

|                    |                                                                                                             |        |
|--------------------|-------------------------------------------------------------------------------------------------------------|--------|
| Appendix Figure S1 | Venn Diagram of ER-SURF substrates                                                                          | Page 2 |
| Appendix Figure S2 | The ERMES and the Tom70-Djp1/Lam6 tether cooperate in the ER-to-mitochondria transfer of precursor proteins | Page 3 |

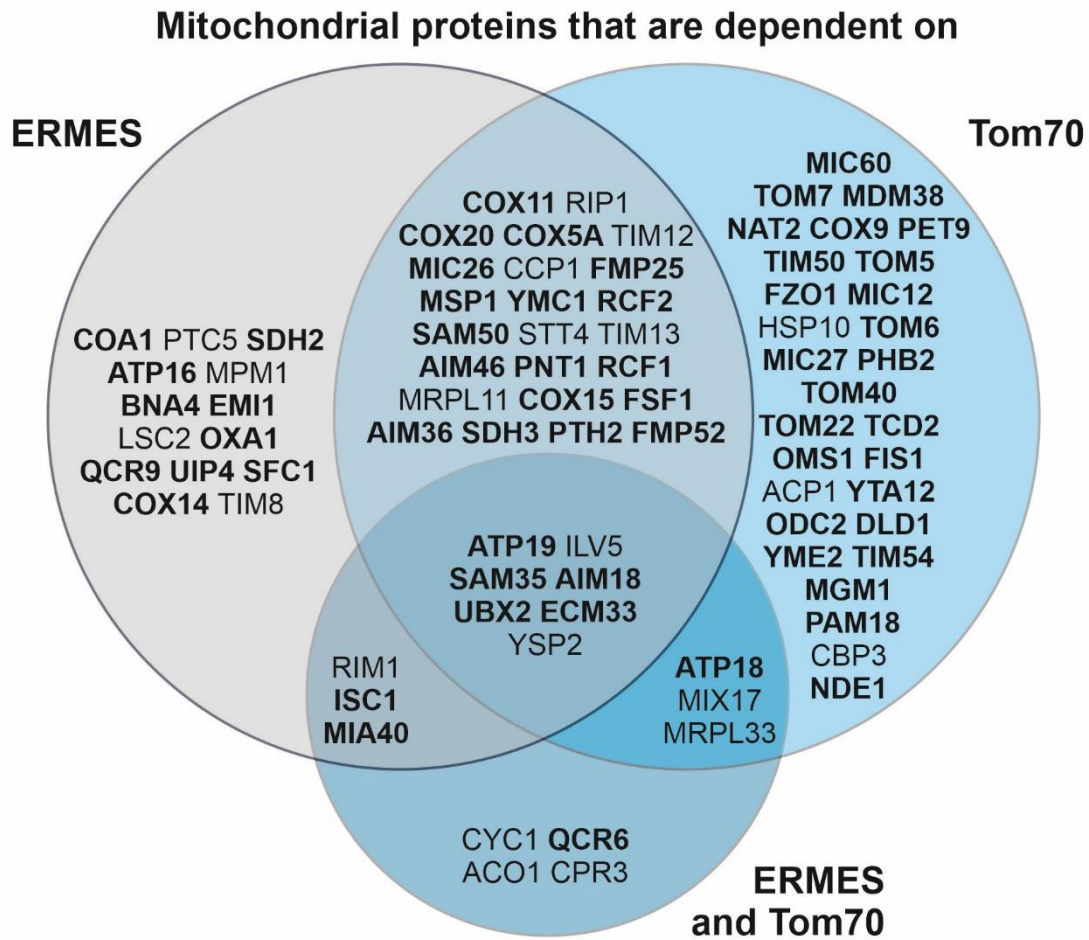

**Appendix Figure S1.** Venn Diagram of ER-SURF substrates (as defined in Fig.5 E) according to the specific dependence on either ERMES, Tom70 or both. Membrane proteins are highlighted in bold.

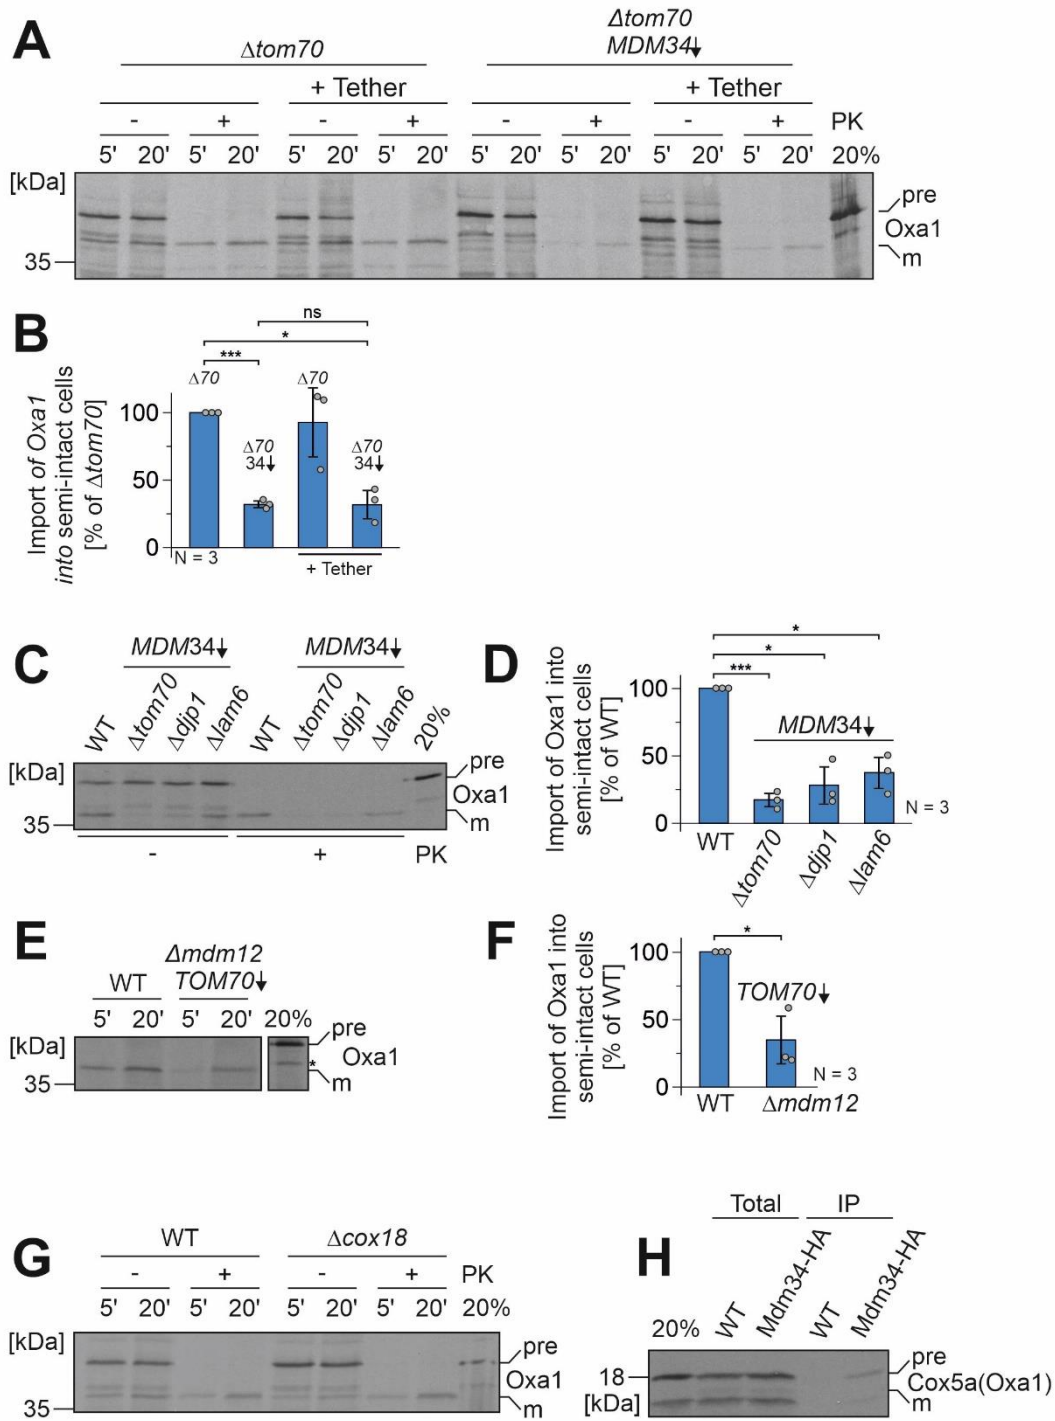

**Appendix Figure S2. The ERMES and the Tom70-Djp1/Lam6 tether cooperate in the ER-to-mitochondria transfer of precursor proteins. A-G.** Radiolabeled Oxa1 precursor was synthesized in reticulocyte lysate and incubated with semi-intact cells of the indicated strains. After 5 and 20 min (in C only after 20 min), aliquots were taken before samples were treated with proteinase K (PK). The experiments were repeated three times from independent semi-

intact cell preparations (biological replicates) and the signals of the imported proteins were quantified. Shown are mean values and standard deviations. Statistical difference was calculated with a student's t-test. Statistical significance was assigned as follows: p-value < 0.05 = \*, p-value < 0.01 = \*\*, p-value < 0.005 = \*\*\*. **H.** Radiolabeled Cox5a(Oxa1) precursor was incubated with semi-intact cells of wild type and Mdm34-HA expressing cells. After 5 min, cells were lysed. The extract was incubated with HA-specific antibodies coupled to protein A Sepharose beads. Beads were washed before bound proteins were eluted with sample buffer and subjected to SDS PAGE. The total samples correspond to 25% of what is shown in the IP (immune precipitation) samples.
